# Supplementary material for: The efficacy and safety of Favipiravir in treatment of COVID-19: a systematic review and meta-analysis of clinical trials
Source: PubMed Central journal article supplement (PMC8155021; doi:10.1038/s41598-021-90551-6), 2021-05-26
Supplement: 41598_2021_90551_MOESM1_ESM.pdf [file 41598_2021_90551_MOESM1_ESM.pdf]

### Supplement 1: Proposed Search Strategy for PubMed

| Search | Search strategy                                                                                                                                                                                                                                                                                                          |
|--------|--------------------------------------------------------------------------------------------------------------------------------------------------------------------------------------------------------------------------------------------------------------------------------------------------------------------------|
| #1     | Search (("2019 nCoV" OR "2019 nCoV" OR "2019 novel coronavirus" OR "COVID-19" [Supplementary Concept] OR "severe acute respiratory syndrome coronavirus 2" [Supplementary Concept] OR "new coronavirus" OR "novel coronavirus" OR "SARS CoV-2" OR (Wuhan AND coronavirus) OR "SARS-CoV" OR "2019-nCoV" OR "SARS-CoV-2")) |
| #2     | (favipiravir [Supplementary Concept] OR Avigan OR T-705 cpd)                                                                                                                                                                                                                                                             |
| #3     | #1 AND #2                                                                                                                                                                                                                                                                                                                |
