# Supplementary material for: The efficacy and safety of Favipiravir in treatment of COVID-19: a systematic review and meta-analysis of clinical trials
Source: PubMed Central journal article supplement (PMC8155021; doi:10.1038/s41598-021-90551-6), 2021-05-26
Supplement: 41598_2021_90551_MOESM2_ESM.pdf [file 41598_2021_90551_MOESM2_ESM.pdf]

|                         | Random sequence generation (selection bias) | Allocation concealment (selection bias) | Blinding of participants and personnel (performance bias) | Blinding of outcome assessment (detection bias) | Incomplete outcome data (attrition bias) | Selective reporting (reporting bias) | Other bias |
|-------------------------|---------------------------------------------|-----------------------------------------|-----------------------------------------------------------|-------------------------------------------------|------------------------------------------|--------------------------------------|------------|
| Cai et al/ 2020         | -                                           | -                                       | -                                                         | +                                               | +                                        | +                                    | +          |
| Chen et al/ 2020        | +                                           | -                                       | -                                                         | -                                               | +                                        | +                                    | +          |
| Dabbous et al/ 2020     | +                                           | +                                       | -                                                         | -                                               | +                                        | +                                    | +          |
| Doi et al/ 2020         | +                                           | +                                       | -                                                         | -                                               | +                                        | +                                    | +          |
| Ivashchenko et al/ 2020 | +                                           | +                                       | -                                                         | -                                               | +                                        | ?                                    | +          |
| Khamis et al/ 2021      | +                                           | ?                                       | -                                                         | -                                               | +                                        | +                                    | +          |
| Lou et al/ 2020         | +                                           | +                                       | -                                                         | -                                               | +                                        | +                                    | +          |
| Udwadia et al/ 2020     | +                                           | +                                       | -                                                         | -                                               | +                                        | +                                    | +          |
| Zhao et al/ 2021        | +                                           | +                                       | -                                                         | -                                               | +                                        | +                                    | +          |
