# Supplementary material for: The efficacy and safety of Favipiravir in treatment of COVID-19: a systematic review and meta-analysis of clinical trials
Source: PubMed Central journal article supplement (PMC8155021; doi:10.1038/s41598-021-90551-6), 2021-05-26

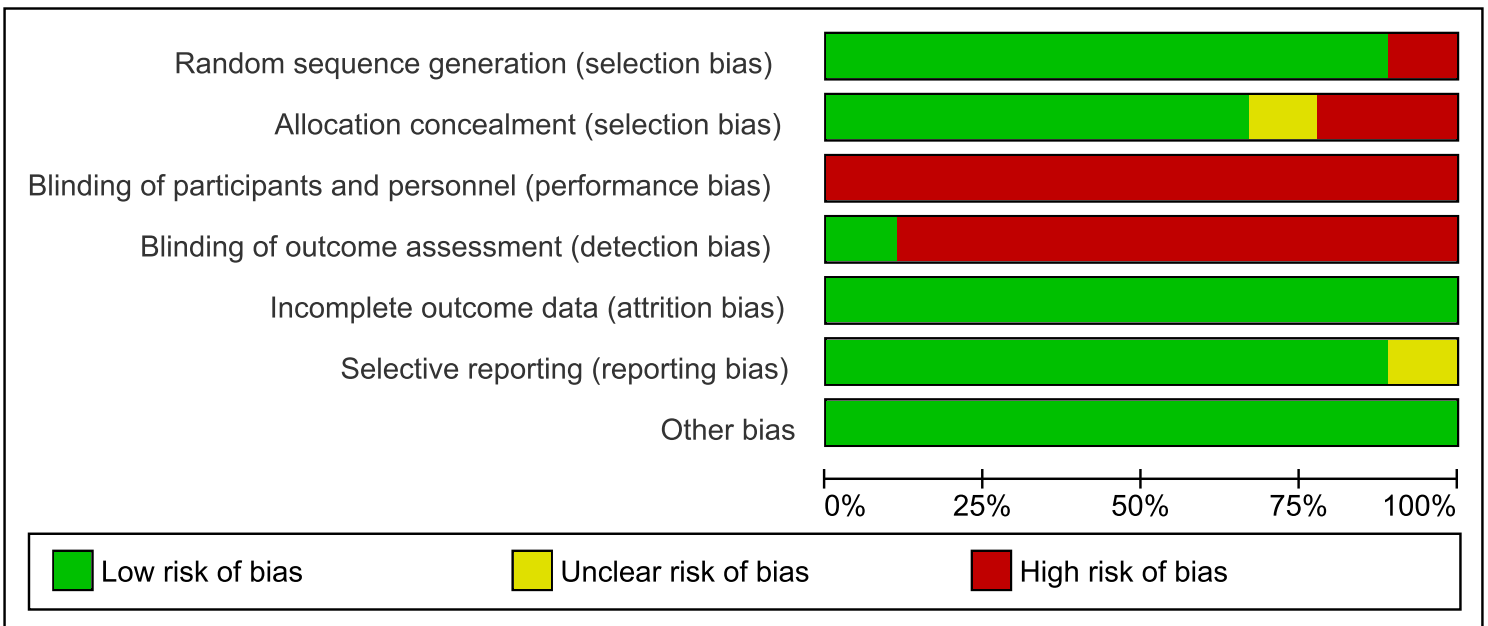

Supplement: 41598_2021_90551_MOESM3_ESM.pdf [file 41598_2021_90551_MOESM3_ESM.pdf]
